# Supplementary material for: Circulating microRNA Panel as a Novel Biomarker to Diagnose Bisphosphonate-Related Osteonecrosis of the Jaw
Source: PubMed Central journal article supplement — Int J Med Sci. 2018 Nov 22;15(14):1694–701. doi: 10.7150/ijms.27593 (PMC6299413; doi:10.7150/ijms.27593), 2018-11-22
Supplement: ijmsv15p1694s1.pdf [file ijmsv15p1694s1.pdf]

Supplementary data

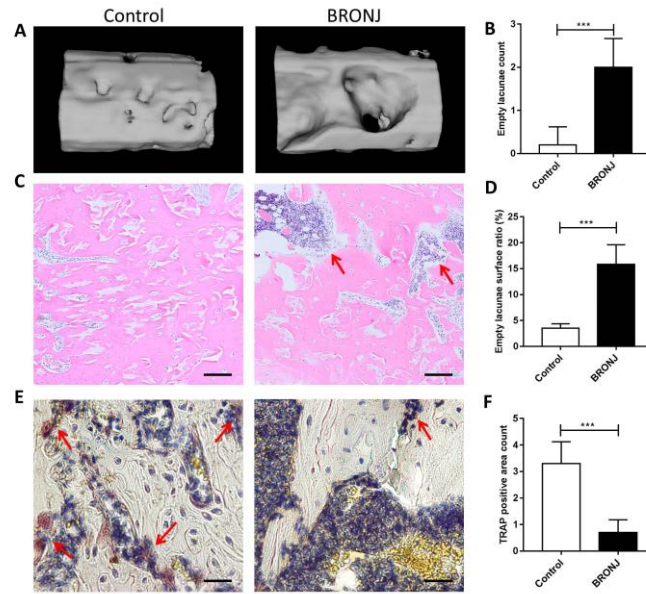

**Figure S1.** The microCT scanning (A), empty lacunae count (B), HE staining (scale bar, 500  $\mu$ m) (C), empty lacunae surface ratio (D), TRAP staining (scale bar, 100  $\mu$ m) (E) and TRAP positive area count (F) of Control and BRONJ groups. Red arrows in (C) showed the bone lesion and inflammatory infiltration, red arrows in (E) showed TRAP positive area.

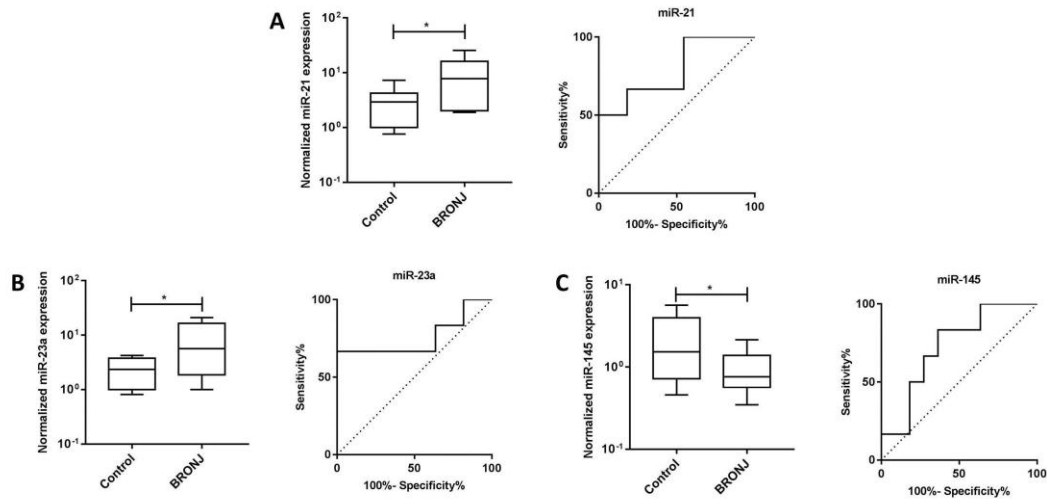

**Figure S2.** The normalized expressions and ROC curves of hsa-miR-21, hsa-miR-23a and hsa-miR-145 in the human sera of the control (n=11) and BRONJ (n=6) groups (\*p < 0.05).

Table S1. Clinical information of participants

|             | Control (n=11)      | BRONJ (n=6)         | <i>p</i> value |
|-------------|---------------------|---------------------|----------------|
| Age (years) | 56.3 (49.0—68.0)    | 58.1 (47.0—66.0)    | 0.552          |
| Gender(M/F) | 0/11                | 0/6                 | \              |
| Height (cm) | 154.3 (148.0—165.0) | 152.8 (146.0—163.0) | 0.539          |
| Weight (kg) | 53.9 (43.0—67.0)    | 51.2 (47.0—65.0)    | 0.514          |

Table S2. Forward primer sequences

| microRNA      | Forward primer         |
|---------------|------------------------|
| Rno-miR-21    | TAGCTTATCAGACTGATGTTGA |
| Rno-miR-23a   | GGGGTTCCTGGGGATG       |
| Rno-miR-28    | CAGAAGGAGCTCACAGTCT    |
| Rno-miR-124-1 | CGTGTTACAGCGGACCTTGAT  |
| Rno-miR-129-1 | CTTTTTCGGTCTGGGCTTGC   |
| Rno-miR-145   | GTCCAGTTTTCCAGGAATC    |
| Rno-miR-149   | CTGGCTCCGTGTCTTC       |
| Hsa-miR-21    | TGTCGGGTAGCTTATCAGACTG |
| Hsa-miR-23a   | TTCCTGGGGATGGGATT      |
| Hsa-miR-145   | ACCTTGCCTCACGGTCC      |
